# Supplementary material for: Spatially explicit models of seed availability improve predictions of conifer regeneration following the 2018 Carr Fire in northern California
Source: Frontiers journal article supplement (doi:10.3389/fevo.2023.1229123), 2023-10-09
Supplement: Data_Sheet_1.pdf [file Data_Sheet_1.pdf]

## 1 Supplementary Figures and Tables

**Supplementary Table 1.**  $\widehat{\Delta elpd}$  and its standard error from LOO.

| Model                  | $\widehat{\Delta elpd}$ | SE   |
|------------------------|-------------------------|------|
| Medium distance kernel | 0.00                    | 0.00 |
| Long distance kernel   | -1.50                   | 2.07 |
| Short distance kernel  | -3.80                   | 4.32 |
| Distance to live tree  | -10.97                  | 5.36 |

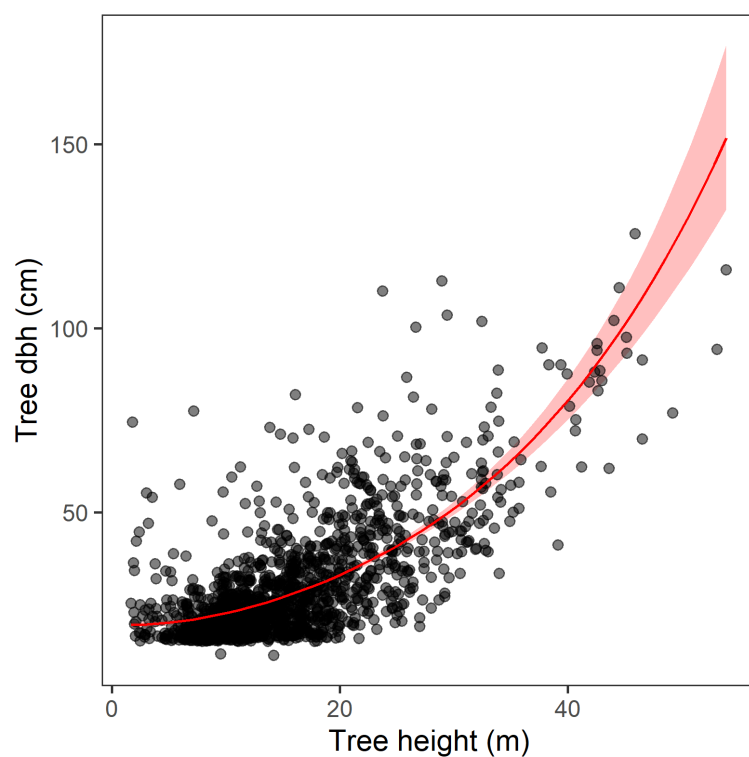

**Supplementary Figure 1.** Model predictions and 95% CI for the tree height-diameter model. Points are observed values taken from the 2012 and 2015 reads of the Klamath Inventory and monitoring network plots that were averaged across years by individual tree.

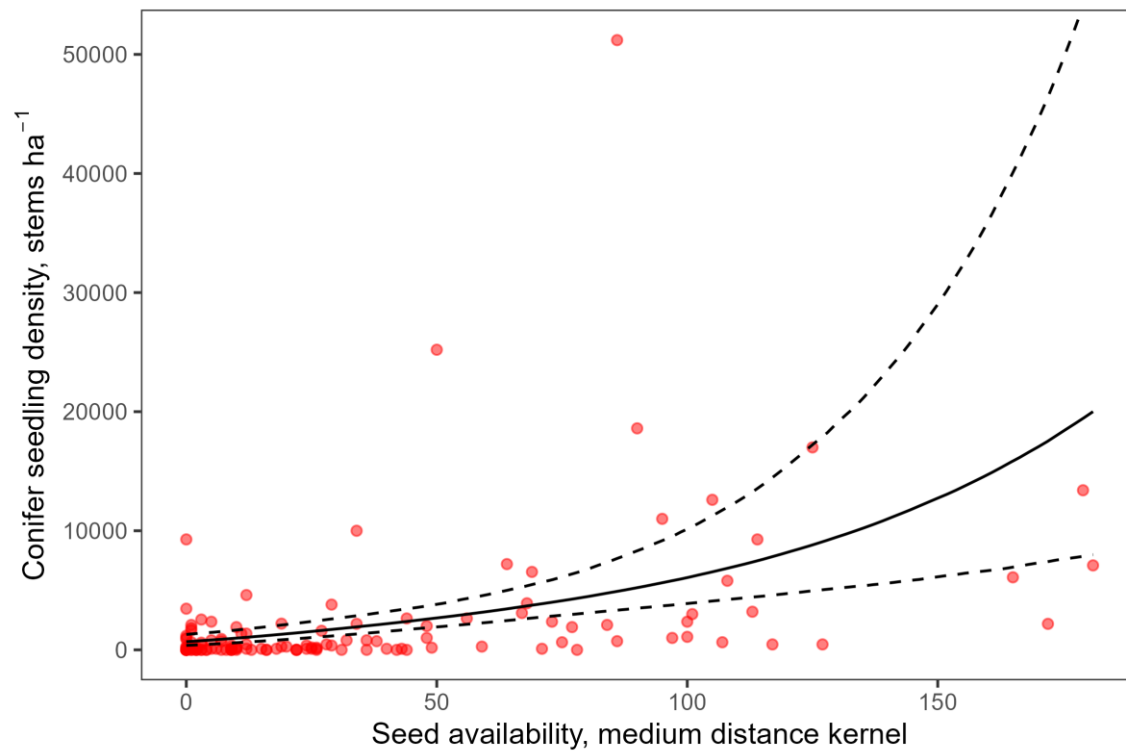

**Supplementary Figure 2.** Model predictions and 95% CI for the best-performing model based on LOO. Points are observed values.
